# Supplementary material
Source: Springer Nature journal article supplement (https://www.springermedizin.de/resource/supplementary/13049_2012_512_MOESM1_ESM.pdf/9666610)
Supplement: MOESM1 [file 9666610]

Clinics

General practice clinics  
n = 351

Control  
n = 171

Direct mail  
n = 180

Physicians

Control  
n = 422

Direct mail  
n = 408

No longer in the clinic (n = 4)  
Lost in mail (n = 1)  
Answered by substitute (n = 1)  
Not willing to answer (n = 1)

Questionnaire received after  
inclusion period (n=1)

Control  
n = 415

Direct-mail  
n = 407

Non-responders  
n = 163

Non-responders  
n = 191

Responders  
n = 252

Responders  
n = 216
